# Supplementary material for: The chemistry of high valent tungsten chlorides with N-substituted ureas, including urea self-protonation reactions triggered by WCl6
Source: Royal Society of Chemistry journal article supplement (doi:10.1039/c6nj01822j), 2016-01-01

# The Chemistry of High Valent Tungsten Chlorides with *N*-Substituted Ureas, Including Urea Self-Protonation Reactions Triggered by $WCl_6$

*Marco Bortoluzzi, Fabio Marchetti, Guido Pampaloni, Stefano Zacchini*

*New Journal of Chemistry*

## Supporting Information

| <b><u>Table of contents</u></b>                                                                               | <i>Page</i> |
|---------------------------------------------------------------------------------------------------------------|-------------|
| <b>Figure S1.</b> Calculated structures of the <i>O</i> - and <i>N</i> -protonated isomers of <b>2</b>        | S2          |
| <b>Table S1.</b> Calculated bonding parameters of the <i>O</i> - and <i>N</i> -protonated isomers of <b>2</b> | S2          |
| <b>Figure S2.</b> Calculated structure of $[dpu]^{2+}$ (triplet state) and spin density surface               | S3          |
| <b>Table S2.</b> Calculated bonding parameters of $[dpu]^{2+}$ (triplet state)                                | S3          |
| <b>Figure S3.</b> Calculated structure of $PhNC(O)NHPh$ and spin density surface                              | S4          |
| <b>Table S3.</b> Calculated bonding parameters of $PhNC(O)NHPh$                                               | S4          |
| <b>Figures S4-S14.</b> IR spectra                                                                             | S5-S11      |

**Figure S1.** DFT-optimized geometries of the *O*- and *N*-protonated isomers of **2** and relative Gibbs energies.  $\omega$ B97X DFT functional, C-PCM solvation model for dichloromethane.

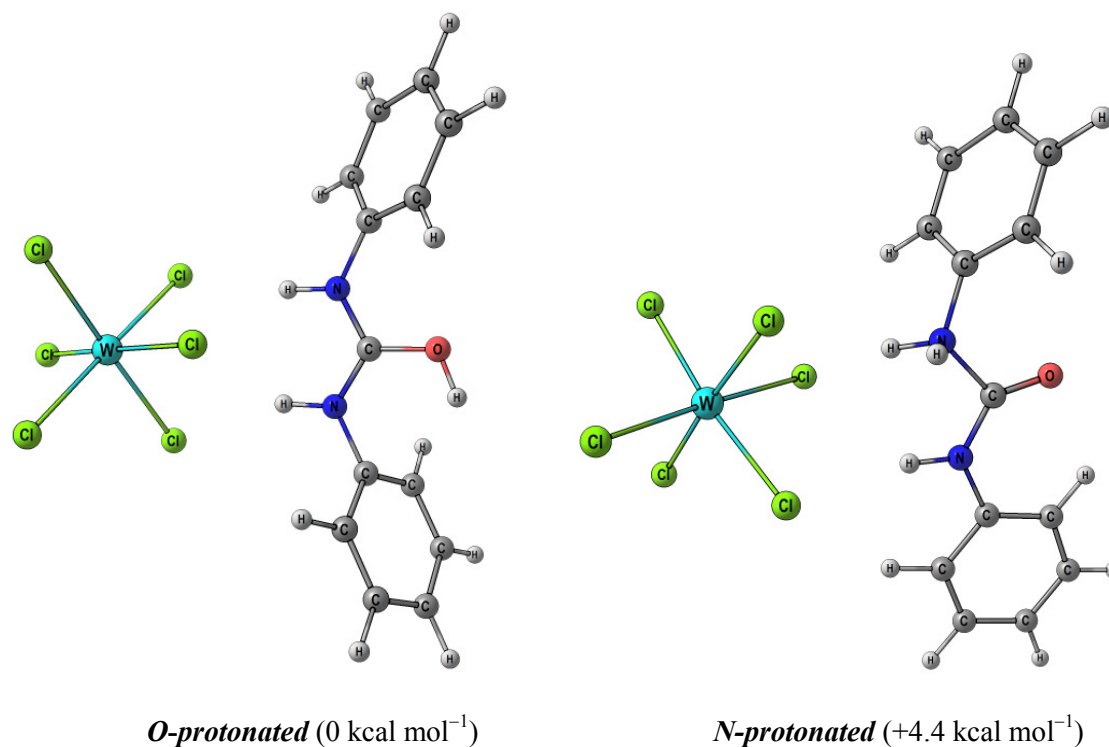

**Table S1.** Selected computed bond lengths (Å) and angles (°) for the *O*- and *N*-protonated isomers of **2**.

| <b>2 (O-protonated)</b>    |       | <b>2 (N-protonated)</b>        |       |
|----------------------------|-------|--------------------------------|-------|
| C–O                        | 1.309 | C–O                            | 1.200 |
| C–N                        | 1.323 | C–NH                           | 1.337 |
|                            | 1.330 | C–NH <sub>2</sub>              | 1.537 |
| N–H                        | 1.019 | N–H ( <i>NH</i> )              | 1.012 |
|                            | 1.019 | N–H ( <i>NH</i> <sub>2</sub> ) | 1.028 |
| O–H                        | 0.971 |                                | 1.036 |
| W–Cl                       | 2.272 | W–Cl                           | 2.256 |
|                            | 2.309 |                                | 2.294 |
|                            | 2.311 |                                | 2.309 |
|                            | 2.315 |                                | 2.351 |
|                            | 2.391 |                                | 2.371 |
|                            | 2.399 |                                | 2.422 |
| H---Cl <sub>shortest</sub> | 2.292 | H---Cl <sub>shortest</sub>     | 2.212 |
|                            | 2.342 |                                | 2.527 |
| -----                      |       |                                |       |
| N–C–O                      | 117.5 | HN–C–O                         | 131.8 |
|                            | 121.3 | H <sub>2</sub> N–C–O           | 118.7 |
| N–C–N                      | 121.2 | N–C–N                          | 109.5 |

**Figure S2.** DFT-optimized geometry of  $[\text{dpu}]^{2+}$  (triplet state) and spin density surface (isovalue = 0.01 a.u.).  $\omega\text{B97X}$  DFT functional, C-PCM solvation model for dichloromethane.

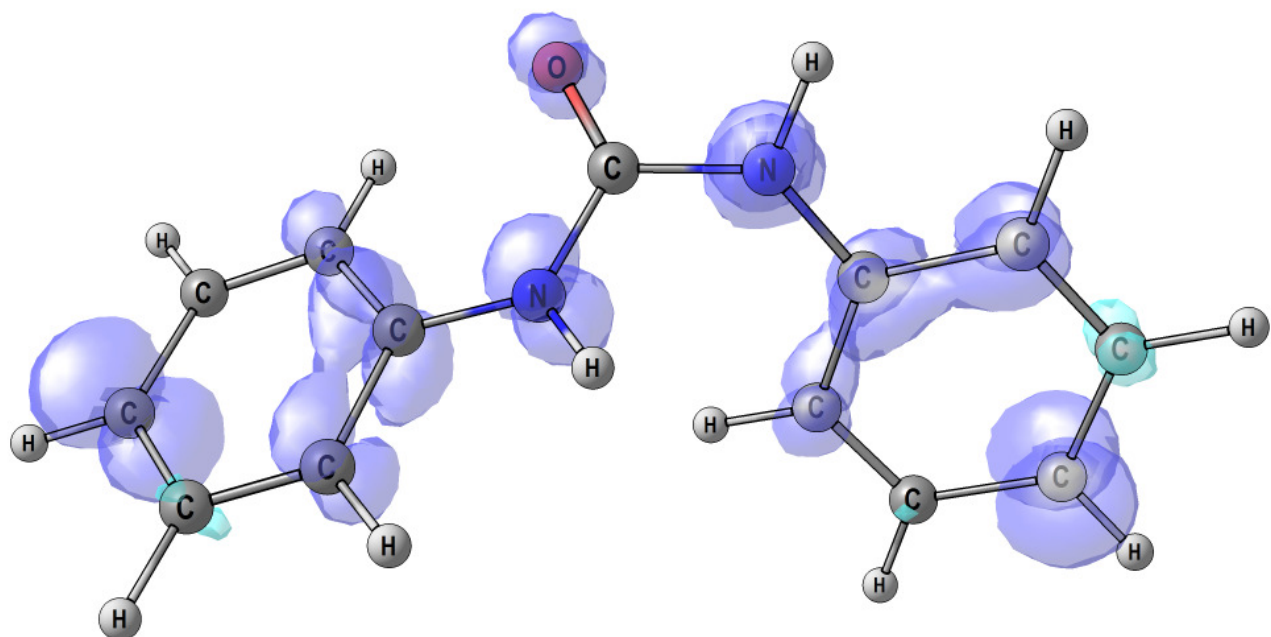

**Table S2.** Selected computed bond lengths (Å) and angles (°) for  $[\text{dpu}]^{2+}$  (triplet state).

| $[\text{dpu}]^{2+}$ |       |
|---------------------|-------|
| C–O                 | 1.197 |
| C–N                 | 1.403 |
|                     | 1.421 |
| N–H                 | 1.017 |
|                     | 1.018 |
| -----               |       |
| N–C–O               | 120.4 |
|                     | 125.1 |
| N–C–N               | 114.4 |

**Figure S3.** DFT-optimized geometry of PhNC(O)NHPPh and spin density surface (isovalue = 0.01 a.u.).  $\omega$ B97X DFT functional, C-PCM solvation model for dichloromethane.

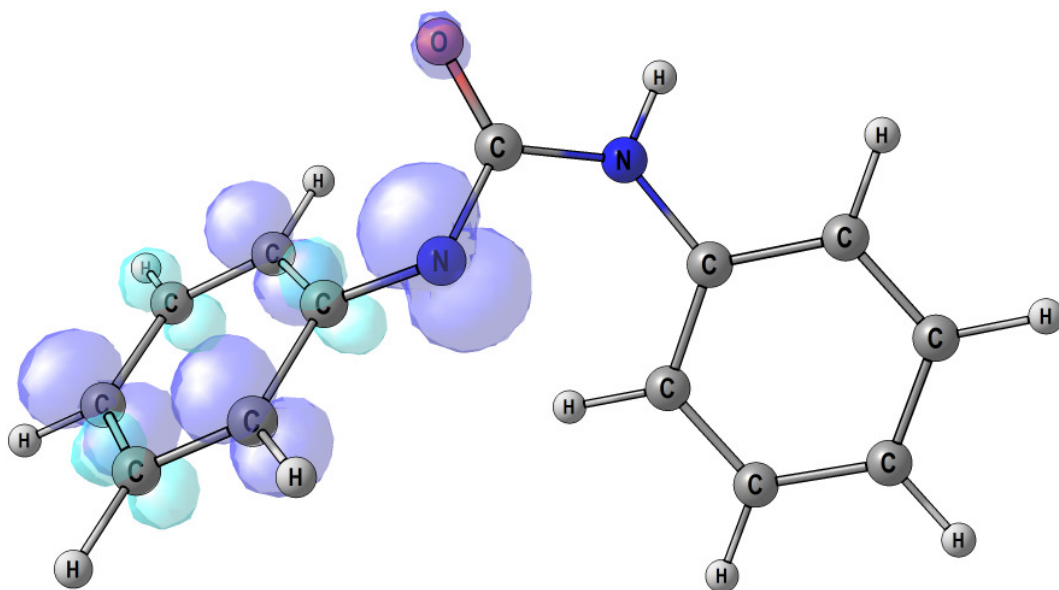

**Table S3.** Selected computed bond lengths ( $\text{\AA}$ ) and angles ( $^\circ$ ) for PhNC(O)NHPPh.

| PhNC(O)NHPPh |       |
|--------------|-------|
| C–O          | 1.227 |
| C–N          | 1.397 |
| C–NH         | 1.368 |
| N–H          | 1.011 |
| -----        |       |
| N–C–O        | 123.5 |
| HN–C–O       | 120.8 |
| N–C–N        | 115.6 |

**Figure S4.** IR spectrum (solid state) of **1a**.

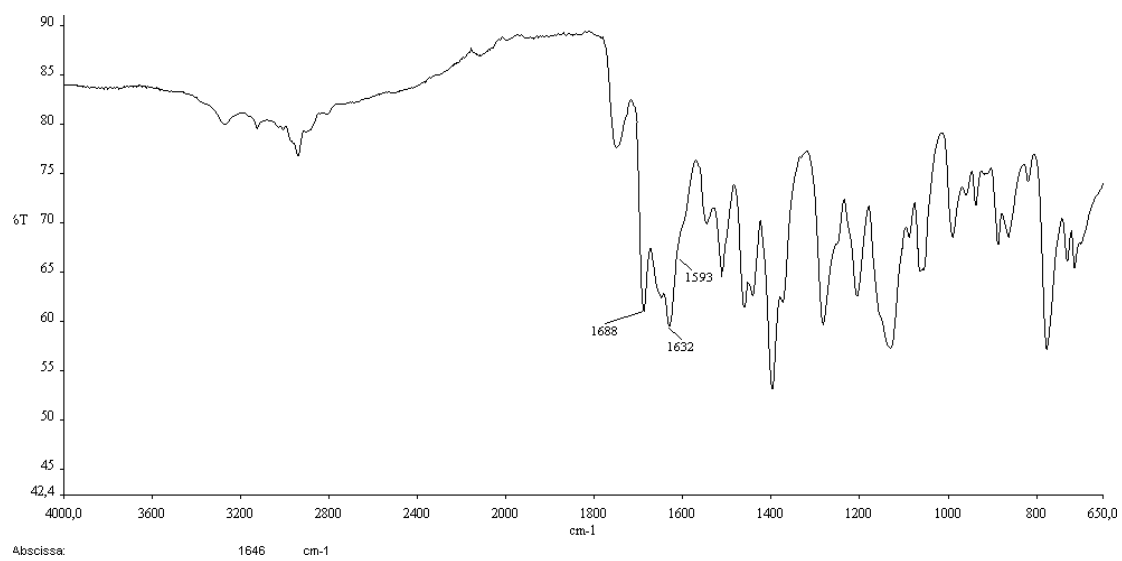

**Figure S5.** IR spectrum (solid state) of **1b**.

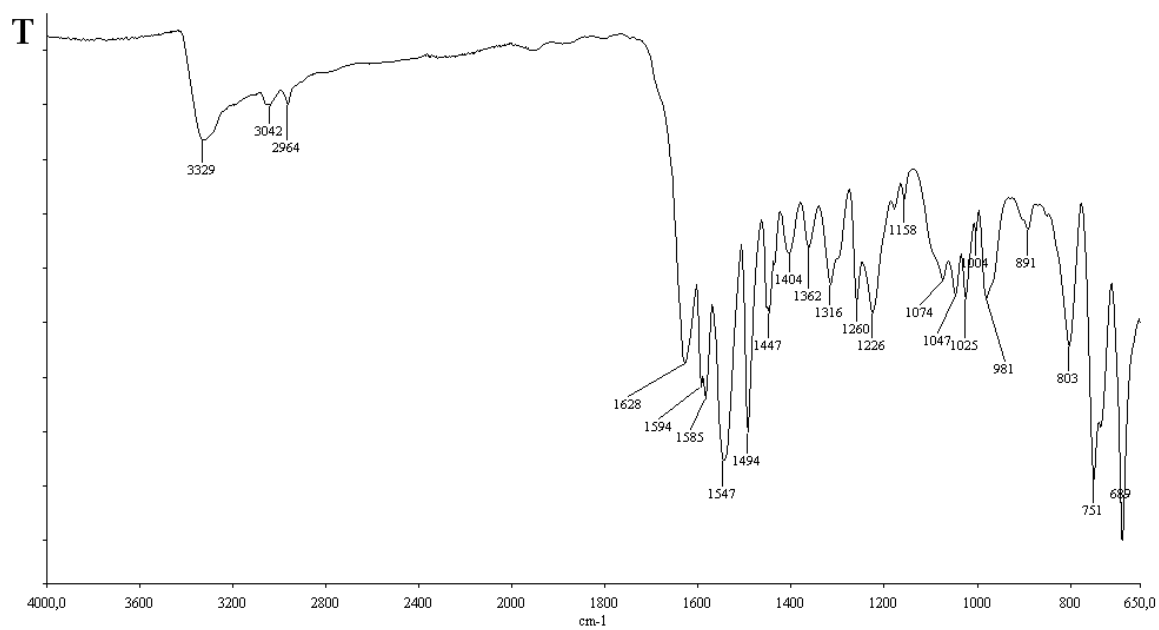

**Figure S6.** Comparative view of the IR spectra of **1b** (black) and 1,3-diphenylurea (dpu, red).

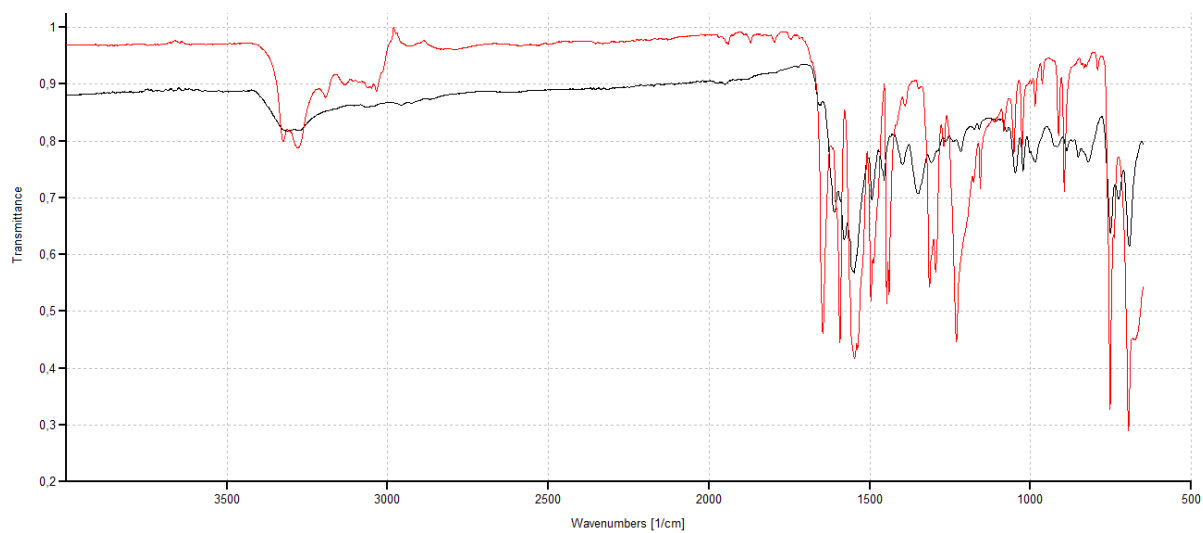

**Figure S7.** IR spectrum (solid state) of **2**.

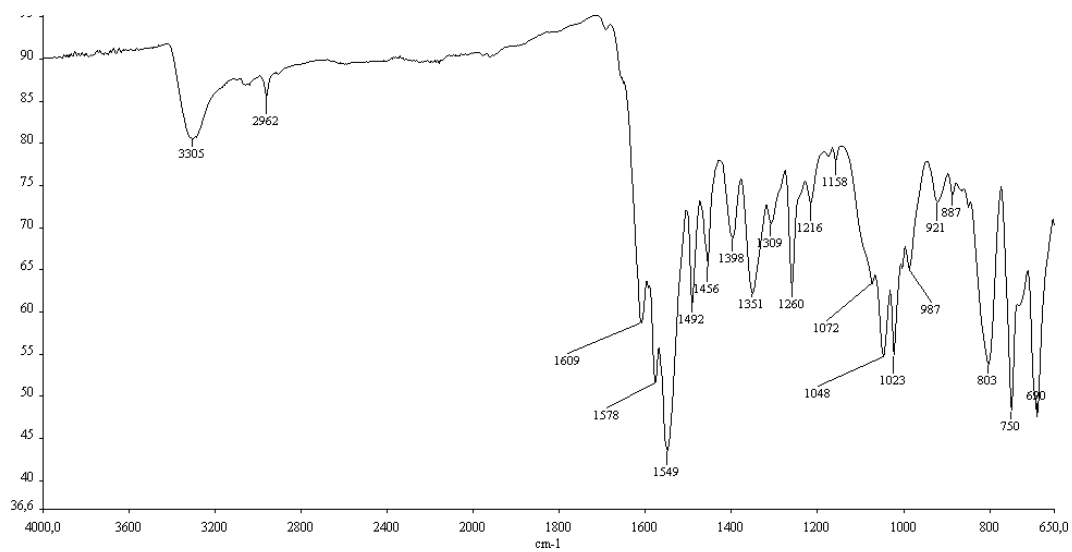

**Figure S8.** Comparative view of the IR spectra of **2** (black) and 1,3-diphenylurea (dpu, red).

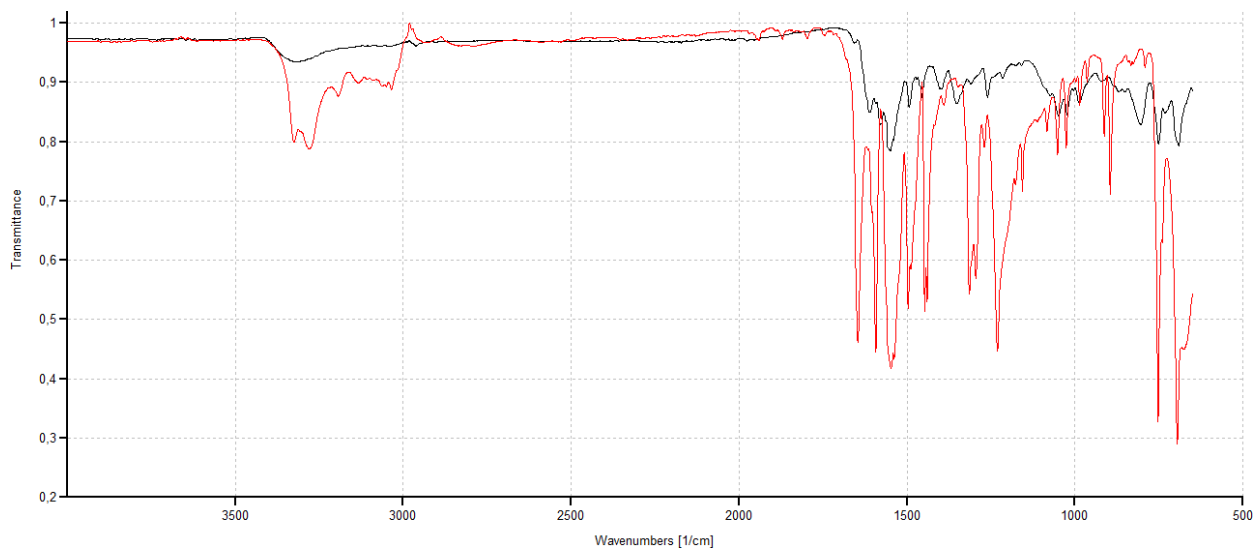

**Figure S9.** IR spectra (solid state) of **3a** (top) and 1,3-dimethylurea (bottom).

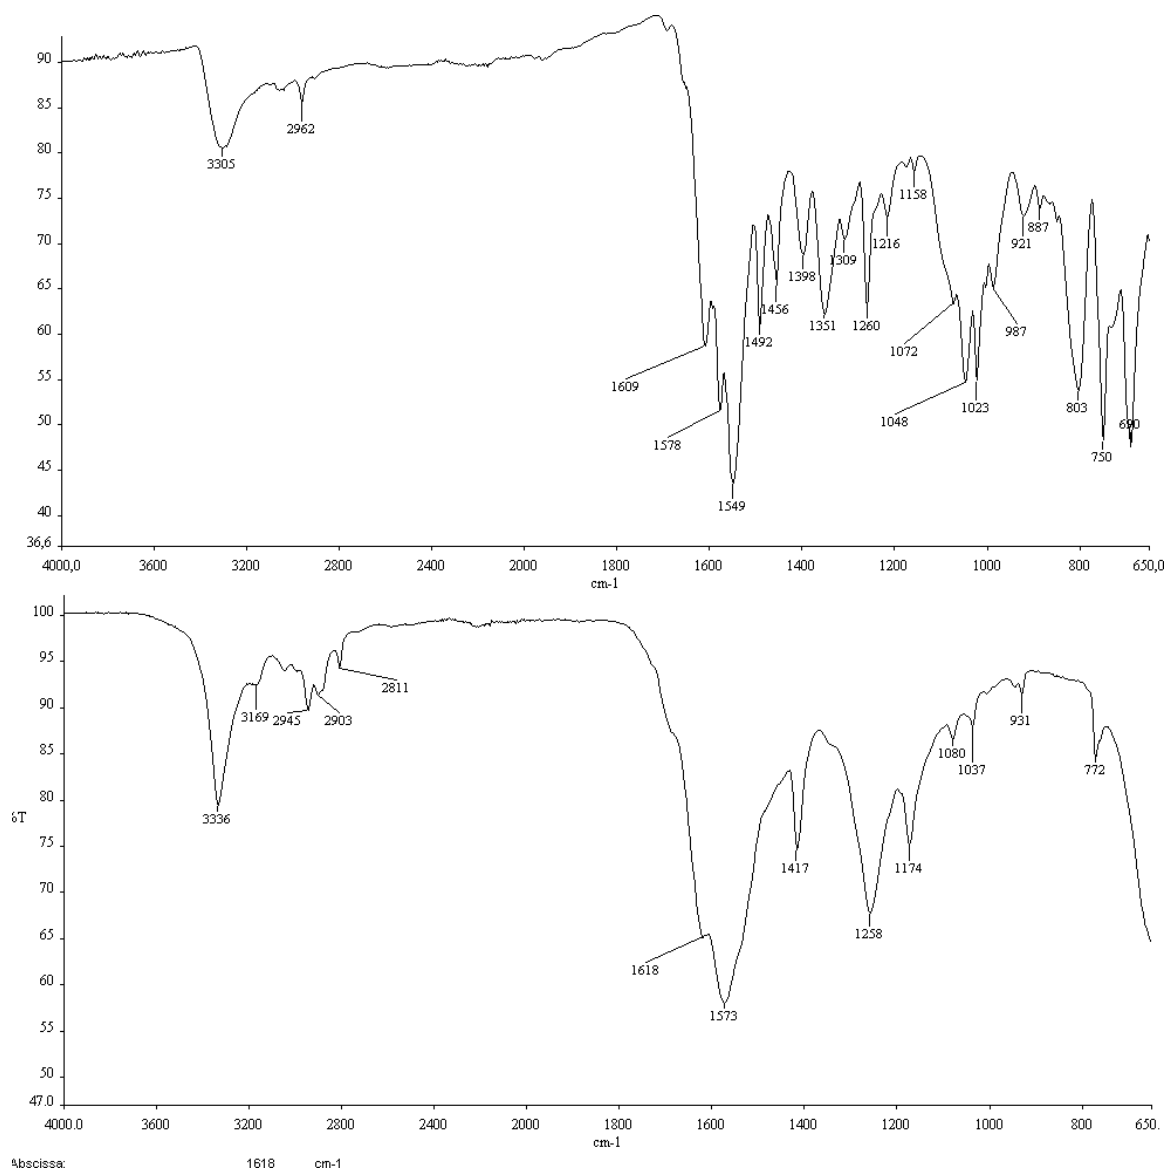



**Figure S10.** IR spectrum (solid state) of **3c**.

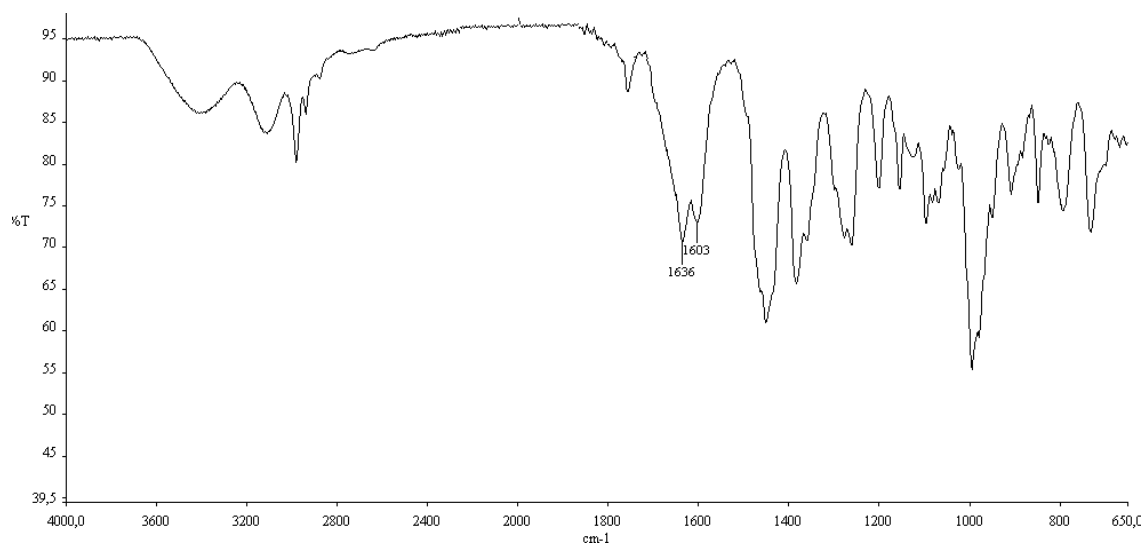

**Figure S11.** IR spectrum (solid state) of **4**.

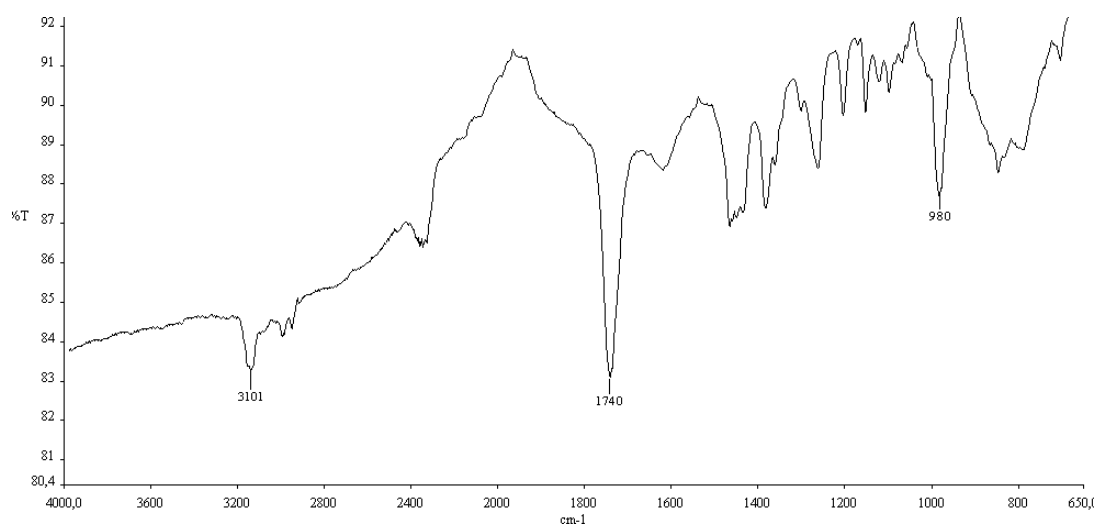

**Figure S12.** IR spectrum (solid state) of **5**.

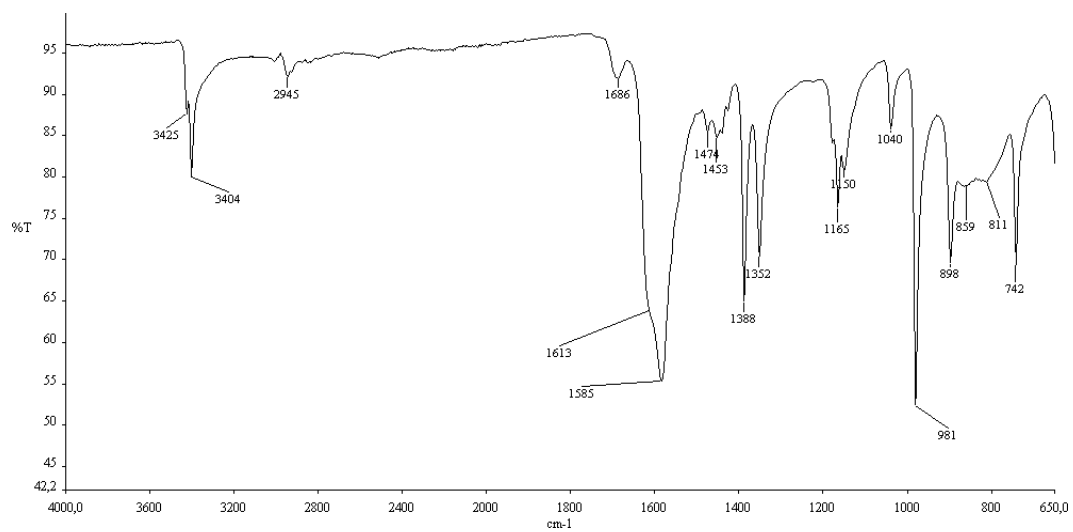

**Figure S13.** Comparative view of the IR spectra of **5** (black) and 1,3-dimethylurea (dmu, red).

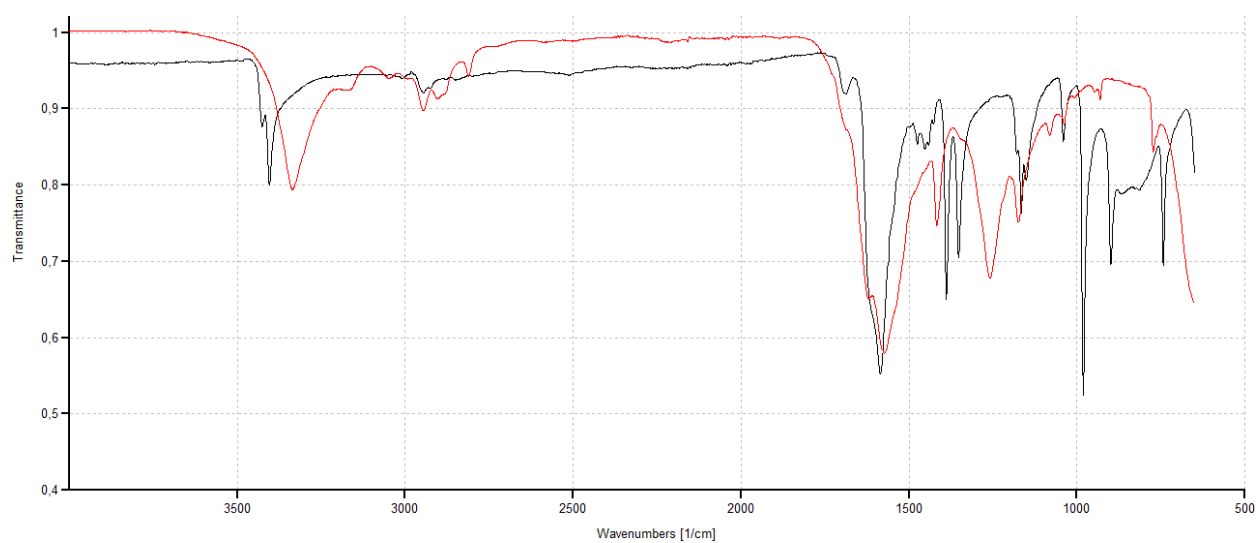

**Figure S14.** IR spectrum of the reaction mixture  $\text{WOCl}_4/\text{dpu}$ .

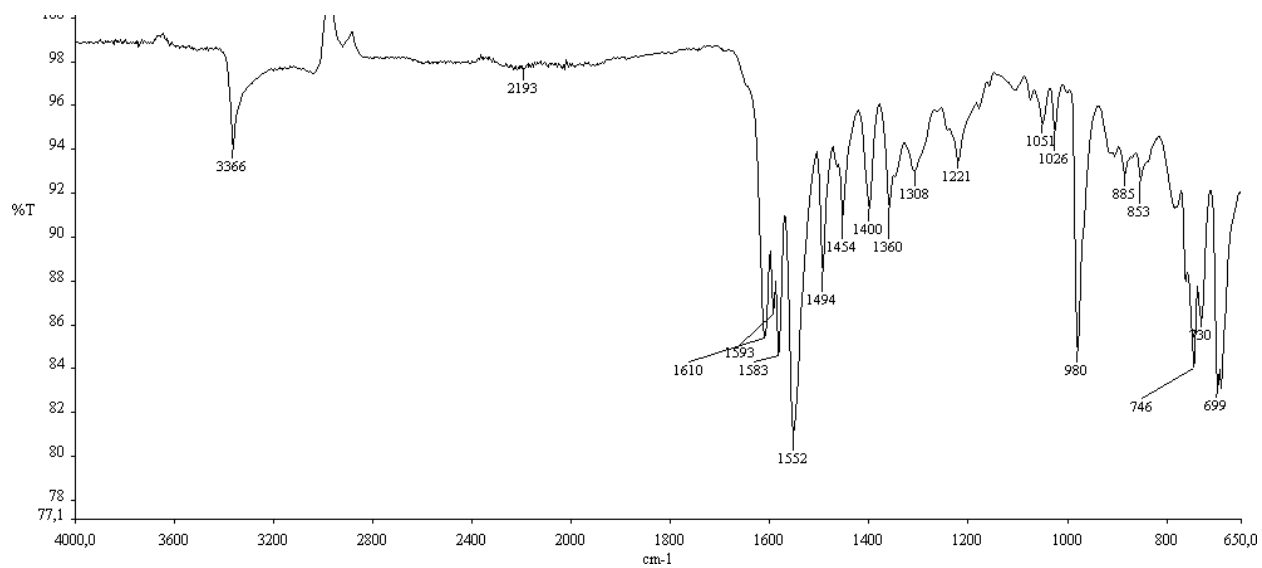

Supplement: c6nj01822j1.pdf [file c6nj01822j1.pdf]
